# Supplementary material for: Characterization of molecular mechanisms driving Merkel cell polyomavirus oncogene transcription and tumorigenic potential
Source: PubMed Central journal article supplement (PMC10468096; doi:10.1371/journal.ppat.1011598), 2023-08-30

A

| Inhibitor      | Target                                              |
|----------------|-----------------------------------------------------|
| C646           | p300 histone acetyltransferase                      |
| Anacardic acid | Histone acetyltransferases (p300, PCAF, Tip60, etc) |
| SGC-CBP30      | p300 histone acetyltransferase                      |
| A485           | p300 histone acetyltransferase                      |
| JQ1            | BET proteins                                        |
| 5-AZADC        | DNA methyltransferases                              |
| Zebularine     | DNA methyltransferases                              |
| SAHA           | Histone deacetylases                                |
| Trichostatin A | Histone deacetylases                                |
| BIX01294       | G9a/GLP (H3K9me1/2) histone methyltransferases      |
| UNC0642        | G9a/GLP (H3K9me1/2) histone methyltransferases      |
| GSK126         | EZH2 (H3K27me3) histone methyltransferase           |
| UNC1999        | EZH2 (H3K27me3) histone methyltransferase           |
| A196           | Suv420h1/2 (H4K20me2/3) histone methyltransferases  |

B

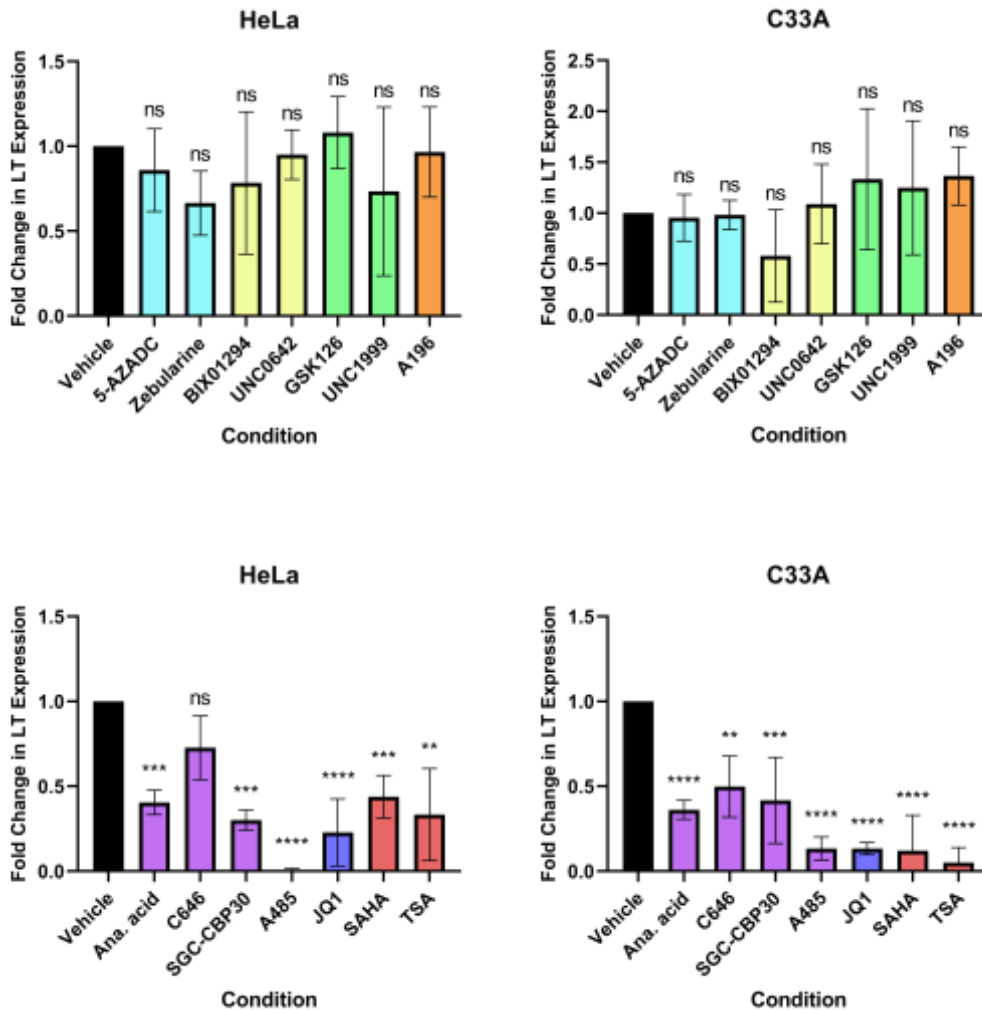

Supplement: ppat.1011598.s001.pdf [file ppat.1011598.s001.pdf]
