# Supplementary material for: Characterization of molecular mechanisms driving Merkel cell polyomavirus oncogene transcription and tumorigenic potential
Source: PubMed Central journal article supplement (PMC10468096; doi:10.1371/journal.ppat.1011598), 2023-08-30

# S2 Figure

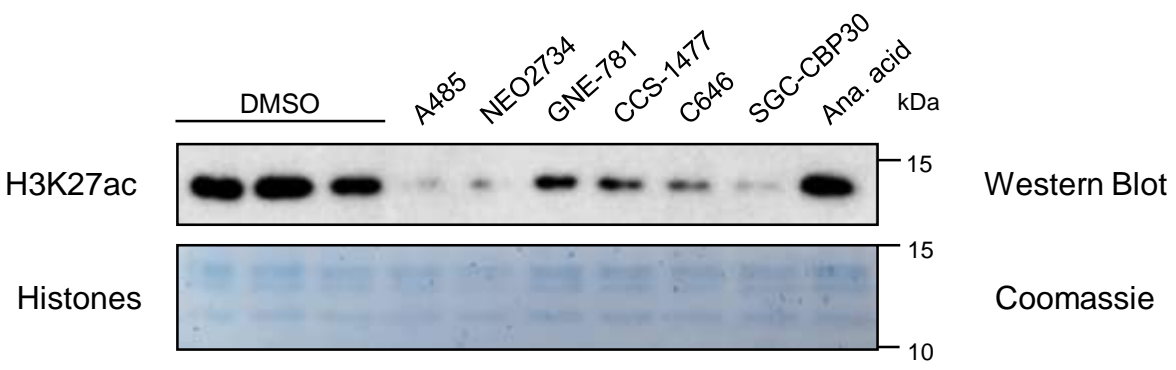

Supplement: ppat.1011598.s002.pdf [file ppat.1011598.s002.pdf]
